# Supplementary material
Source: Copernicus journal article supplement (doi:10.5194/wcd-7-767-2026)
Supplement: Supplementary file 1 [file wcd-7-767-2026-supplement.pdf]

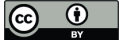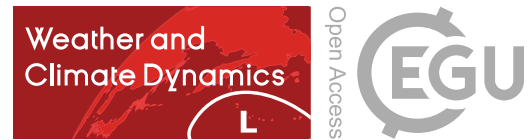

*Supplement of*

## **A spread-versus-error framework to reliably quantify the potential for subseasonal windows of forecast opportunity**

**Philip Rupp et al.**

*Correspondence to:* Thomas Birner (thomas.birner@lmu.de)

The copyright of individual parts of the supplement might differ from the article licence.

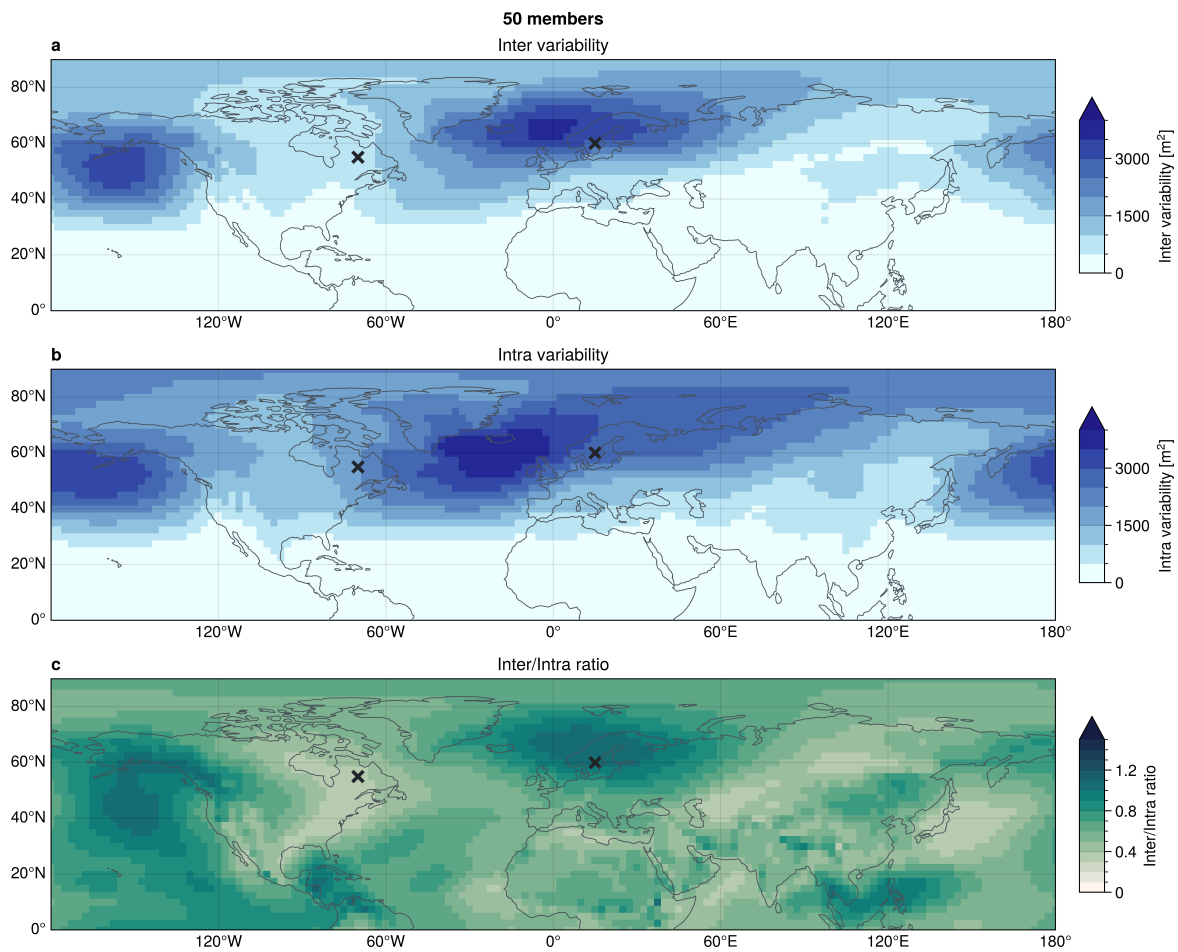

Figure S1: (a) Inter- and (b) intra-variability of z1000 ensemble variance for 50-member ensembles and the northern hemisphere. Inter-variability is computed as the standard deviation across different forecasts of subseasonal leadtime-averaged (days 14-46) ensemble variance, and intra-variability as standard deviation over subseasonal leadtimes of variance and then averaged over all forecasts. (c) shows the ratio of inter-over-intra variability. Crosses indicate locations in eastern Canada and northern Europe analysed in other Figures.

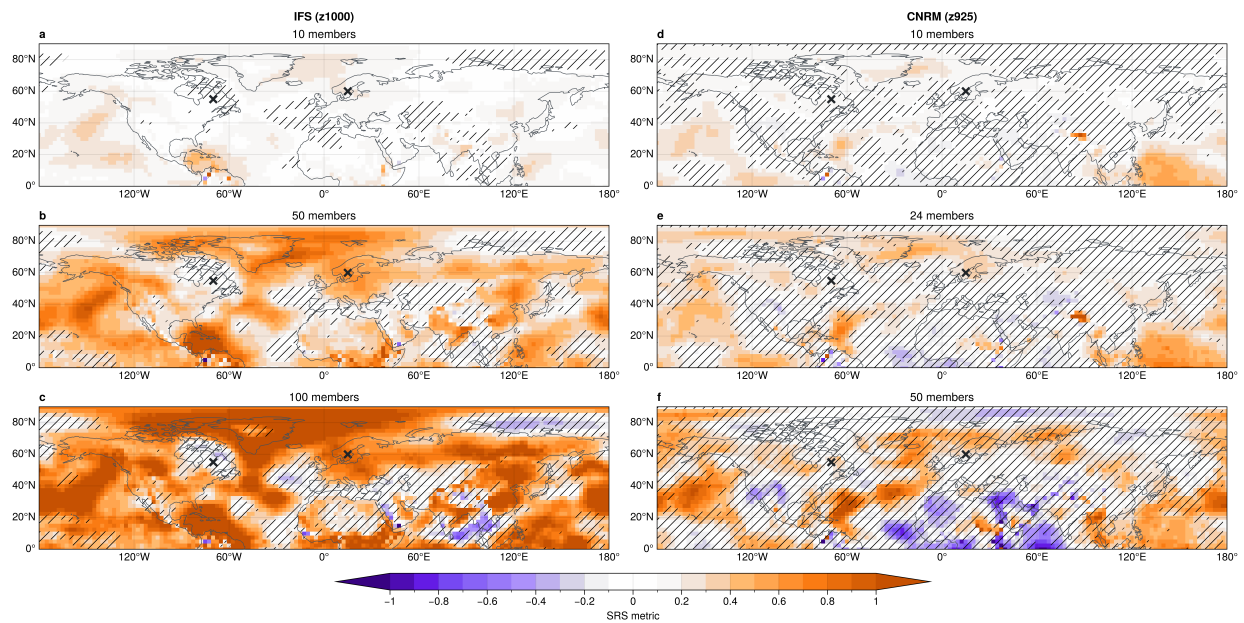

Figure S2: Comparison of *SRS* describing the spread-error slope between forecasts using the (a,b,c) IFS model and the CNRM model (d,e,f). Note that the panels show z1000 for IFS and z925 for CNRM. Different rows within a column show *SRS* for different ensemble sizes, although ensemble sizes differ between the two models. Hatched areas indicate regions where the *SRS* is not statistically different from zero at the 99% confidence level. Crosses indicate locations in eastern Canada and northern Europe analysed in other Figures.

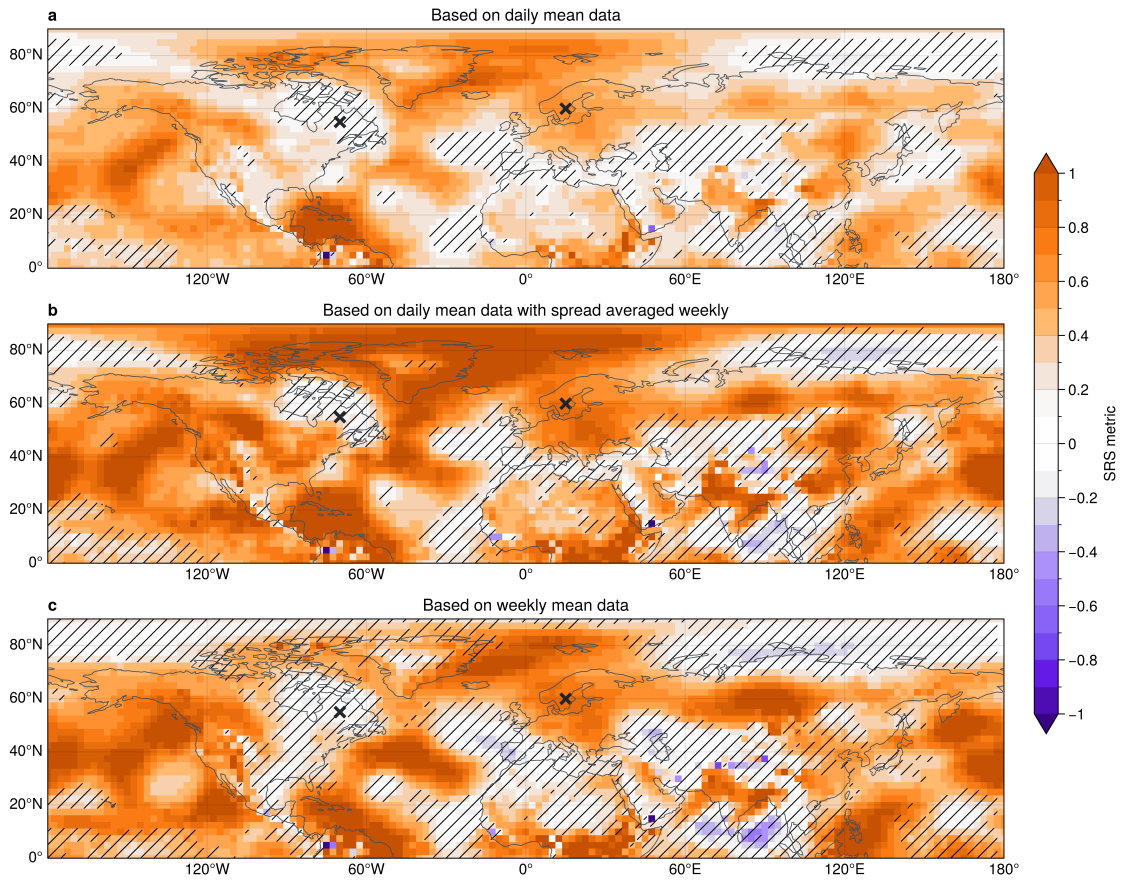

Figure S3: Northern hemisphere maps of *SRS* in 50-member ensembles. (a) shows *SRS* computed for spread based on daily data, (b) shows *SRS* computed from weekly-averaged spread based on daily data and (c) *SRS* for spread based on weekly data. Hatched areas indicate regions where the *SRS* is not statistically different from zero at the 99% confidence level. Crosses indicate locations in eastern Canada and northern Europe analysed in other Figures.
